# Supplementary material for: Evidence-ranked motif identification
Source: PubMed Central journal article supplement (PMC2872879; doi:10.1186/gb-2010-11-2-r19), 2010-02-15
Supplement: gb-2010-11-2-r19-S1.pdf [file gb-2010-11-2-r19-S1.pdf]

## Supplementary Information

### Evaluation of different components of the cERMIT algorithm

In this section we provide detailed evaluation of cERMIT with regard to the scoring function only, i.e. on all 6-mers without further search; adding the search; and adding conservation. We contrasted these comparisons with using a range of pre-defined cutoffs on P values, i.e. with a thresholded scoring function instead of averaging. All analyses were performed based on the 156 yeast ChIP-chip datasets from [31] (see Table 1 in main text), reporting the top prediction and the subset of 150 datasets [25] (see Table 2 in main text), reporting the top 4 predictions. The similarity cutoff used was as described in the main text (Harbison similarity  $\geq 0.75$ ).

Table 1: Comparison of different settings of cERMIT: fixed motif size (6-mers)

| Scoring function | top 1 prediction  |                      | top 4 predictions |                      |
|------------------|-------------------|----------------------|-------------------|----------------------|
|                  | with conservation | without conservation | with conservation | without conservation |
| log_pvalues_Ave  | 73/156            | 45/150               | 99/156            | 65/150               |
| BF_Ave           | 69/156            | 47/150               | 96/156            | 66/150               |
| BF_Sel_0.01      | 63/156            | 47/150               | 94/156            | 62/150               |
| BF_Sel_0.005     | 66/156            | 47/150               | 90/156            | 62/150               |
| BF_Sel_0.001     | 64/156            | 43/150               | 97/156            | 62/150               |

Table 2: Comparison of different settings of cERMIT: variable motif size

| Scoring function | top 1 prediction  |                      | top 4 predictions |                      |
|------------------|-------------------|----------------------|-------------------|----------------------|
|                  | with conservation | without conservation | with conservation | without conservation |
| log_pvalues_Ave  | 84/156            | 76/150               | 109/156           | 94/150               |
| BF_Ave           | 87/156            | 75/150               | 114/156           | 92/150               |
| BF_Sel_0.01      | 89/156            | 65/150               | 112/156           | 88/150               |
| BF_Sel_0.005     | 89/156            | 73/150               | 112/156           | 91/150               |
| BF_Sel_0.001     | 91/156            | 62/150               | 110/156           | 90/150               |

*Legend:*

Ave = 'Averaging' scoring function

Sel = 'Selection' scoring function (Sel\_0.01 implies p-value cutoff = 0.01)

BF = Bayes Factors

## Performance evaluation on “easy” and “hard” cases

In this section we briefly report on the performance of cERMIT on ChIP-chip datasets from Table 2 in the main text, on which all motif discovery methods perform well and on those on which all methods perform poorly. There are 34 datasets on which all methods find the known literature consensus. Without using conservation ERMIT successfully recovers 30 out of the 34. When using conservation, cERMIT recovers 32 out of the 34. There are 54 datasets on which none of the motif finders recovers the known literature consensus. Without using conservation ERMIT successfully recovers 12(22%). When using conservation, cERMIT recovers 25(46%).

## Yeast ChIP-chip Additional Results

When applying cERMIT to the yeast ChIP-chip data, there are several cases in which the literature motif is among the top three or four reported motifs, but not at the top (cf Tables 1 and 2). We further investigated the top predicted motifs in cases for which a significant p-value did not match the literature consensus of the factor assayed in the experiment. At least for eight cases, there is convincing circumstantial evidence explaining the predictions:

1. DAL81\_RAPA: The second best prediction matches the literature; the top prediction seems to match a few TFs that are all involved in a similar process: response to nitrogen catabolism (GAT1, GZF3, GLN3, DAL80)
2. TEC1\_BUT14: The second best prediction matches literature; the top prediction matches the STE12 motif, and the two are known to form a complex: the second best prediction in STE12\_Alpha in turn matches the TEC1 site (this was also reported in [10])
3. TEC1\_Alpha: the top prediction again matches the STE12 motif
4. INO4\_YPD: the top prediction matches the INO2 consensus, a family member with a highly similar binding profile, at a similarity of 0.86 (similarity metric defined in the main text); the similarity to the INO4 site just falls below our threshold
5. MSN4\_H2O2\_Hi and
6. MSN2\_H2O2\_Lo: The second best predictions match the literature. The top prediction matches the literature consensus of YAP family members, and YAP1 is known to be active under oxidative stress.
7. MET32\_SM: and
8. MET32\_YPD: The second best predictions match the literature. The top prediction matches the literature consensus of CBF1, which is one of the known auxiliary co-factors involved in the transcriptional regulation of the sulfur amino acid pathway

## Full Yeast ChIP-chip Prediction Results

cERMIT predictions on the 156 yeast chip-chip datasets from [31] that have known literature consensus

| # | experiment  | literature | prediction | Harb. similarity | cluster | p-value |
|---|-------------|------------|------------|------------------|---------|---------|
| 1 | FKH2_YPD    | TTGTTTACC  | TGTTTAC    | 0.98             | 1       | 0.0000  |
| 2 | NRG1_H2O2Hi | CCCT       | CCCTR      | 0.98             | 4       | 0.0000  |
| 3 | MET32_SM    | CCACAGTTT  | CCACAGT    | 0.98             | 2       | 0.0002  |
| 4 | MAC1_H2O2Hi | GAGCAAA    | RYGAGCAA   | 0.98             | 1       | 0.0003  |
| 5 | PHO4_Pi-    | CNMACGTG   | MACGTGGK   | 0.98             | 1       | 0.0000  |
| 6 | RPN4_H2O2Lo | TTTGCCACC  | TTTGCCMCC  | 0.98             | 1       | 0.0000  |
| 7 | MAC1_YPD    | GAGCAAA    | GAGCAAA    | 0.98             | 1       | 0.0000  |
| 8 | BAS1_YPD    | GAGTCA     | RGAGTCA    | 0.98             | 1       | 0.0000  |
| 9 | STE12_BUT14 | ATGAAAC    | TGAAACR    | 0.98             | 1       | 0.0000  |

|    |             |                  |           |      |   |        |
|----|-------------|------------------|-----------|------|---|--------|
| 10 | MBP1_YPD    | ACGCGT           | YNACGCGT  | 0.98 | 1 | 0.0000 |
| 11 | RCS1_SM     | AAMTGGGTGCAKT    | GGGTGCA   | 0.98 | 1 | 0.0034 |
| 12 | MBP1_H2O2Lo | ACGCGT           | YRACGCGT  | 0.98 | 1 | 0.0000 |
| 13 | STE12_Alpha | ATGAAAC          | TGAAACR   | 0.98 | 1 | 0.0000 |
| 14 | REB1_YPD    | TTACCCGG         | RTTRCCCG  | 0.98 | 1 | 0.0000 |
| 15 | YAP7_H2O2Lo | TTAGTAA          | MTTAGTAA  | 0.98 | 1 | 0.0000 |
| 16 | STB5_YPD    | CGG              | CGGTGYT   | 0.98 | 1 | 0.0000 |
| 17 | RAP1_YPD    | WRMACCCATACAYY   | ACCCA     | 0.98 | 1 | 0.0000 |
| 18 | ACE2_YPD    | ACCAGC           | MACCAGC   | 0.98 | 1 | 0.0000 |
| 19 | GAT1_RAPA   | GATAA            | GATAASRNA | 0.98 | 1 | 0.0007 |
| 20 | HAP5_YPD    | CCAAT            | RCCAATG   | 0.98 | 3 | 0.6319 |
| 21 | HAC1_YPD    | KGMCAGCGTGTC     | CGTGTC    | 0.98 | 1 | 0.0015 |
| 22 | SUM1_YPD    | MTTTTGTGSCRCT    | TTTGTG    | 0.98 | 1 | 0.0000 |
| 23 | RCS1_H2O2Lo | AAMTGGGTGCAKT    | GGGTGCA   | 0.98 | 1 | 0.0000 |
| 24 | MBP1_H2O2Hi | ACGCGT           | ACGCG     | 0.98 | 1 | 0.0000 |
| 25 | HAP3_YPD    | CCAAT            | RRCCAAT   | 0.98 | 3 | 0.3282 |
| 26 | STE12_YPD   | ATGAAAC          | TGAAACR   | 0.98 | 1 | 0.0000 |
| 27 | HAP2_YPD    | ATTGG            | ATTGGNYNR | 0.98 | 2 | 0.2250 |
| 28 | STE12_BUT90 | ATGAAAC          | TGAAACR   | 0.98 | 1 | 0.0000 |
| 29 | CAD1_SM     | TTAGTAA          | MTTAGTAA  | 0.98 | 1 | 0.0004 |
| 30 | YAP7_H2O2Hi | TTAGTAA          | TACTAAKNS | 0.98 | 1 | 0.0000 |
| 31 | RCS1_H2O2Hi | AMTGCACCCAKTT    | TGCACCC   | 0.98 | 1 | 0.0000 |
| 32 | FKH2_H2O2Hi | GGTAAACAA        | GTAAACA   | 0.98 | 1 | 0.0000 |
| 33 | FKH2_H2O2Lo | GGTAAACAA        | AAACA AW  | 0.98 | 4 | 0.2752 |
| 34 | HAP2_RAPA   | ATTGG            | CWSATWGG  | 0.98 | 1 | 0.0000 |
| 35 | HAP5_SM     | ATTGG            | TSATTGG   | 0.98 | 2 | 0.0001 |
| 36 | LEU3_SM     | MRCCGGTACCGCR    | CCGGY     | 0.98 | 1 | 0.0000 |
| 37 | BAS1_SM     | GAGTCA           | RGAGTCA   | 0.98 | 1 | 0.0100 |
| 38 | GLN3_RAPA   | GATAAGATAAG      | GATAAGR   | 0.98 | 1 | 0.0000 |
| 39 | DAL82_RAPA  | GAAAATTGCGTT     | ATTGCG    | 0.98 | 2 | 0.4618 |
| 40 | SIP4_SM     | YCGGAYRRRAWGG    | AATGGAG   | 0.98 | 1 | 0.0047 |
| 41 | REB1_H2O2Lo | TTACCCGG         | TTRCCCG   | 0.97 | 1 | 0.0000 |
| 42 | MCM1_YPD    | WTTCCYAAWNNGGTAA | TCCYAA    | 0.97 | 1 | 0.0002 |
| 43 | ZAP1_YPD    | ACCCTAAAGGT      | TASCCTA   | 0.97 | 1 | 0.0072 |
| 44 | YAP1_H2O2Lo | TTASTMA          | TTASTMAKC | 0.97 | 1 | 0.0000 |
| 45 | INO2_YPD    | GATGTGAAAT       | ATGTGAAR  | 0.96 | 1 | 0.0000 |
| 46 | TEC1_YPD    | RGAATG           | RGAATGY   | 0.96 | 4 | 0.0260 |
| 47 | MET32_YPD   | CCACAGTTT        | KCCACART  | 0.96 | 2 | 0.0003 |
| 48 | FKH1_YPD    | GGTAAACAA        | GTMAACA   | 0.96 | 1 | 0.0000 |
| 49 | TEC1_BUT14  | CATTCY           | RCATTCY   | 0.96 | 2 | 0.0053 |
| 50 | CIN5_H2O2Lo | TTACTAA          | TTACRTMAK | 0.95 | 1 | 0.0000 |
| 51 | RCS1_YPD    | AMTGCACCCAKTT    | TGMACCC   | 0.95 | 1 | 0.0703 |
| 52 | CBF1_YPD    | RTCACRTGA        | RTCACRTG  | 0.94 | 1 | 0.0000 |
| 53 | CAD1_YPD    | TTAGTAA          | MTTAGTMA  | 0.94 | 1 | 0.0000 |
| 54 | MSN2_H2O2Hi | MAGGGG           | MAGGGGK   | 0.94 | 1 | 0.0000 |
| 55 | HSF1_H2O2Lo | AGAANNTTCTAGAA   | YTCTRGAA  | 0.94 | 1 | 0.0000 |
| 56 | MET31_YPD   | CCACAGTTT        | GCCMCAST  | 0.94 | 1 | 0.0000 |
| 57 | UME6_YPD    | WGCCGCCGW        | WTWGCCGC  | 0.94 | 1 | 0.0000 |
| 58 | SKO1_YPD    | TGACGT           | ATGRCGT   | 0.94 | 1 | 0.0000 |
| 59 | HSF1_H2O2Hi | AGAANNTTCTAGAA   | YTCTRGAA  | 0.94 | 1 | 0.0000 |
| 60 | RPN4_YPD    | GGTGGCAA         | GGTKGCA   | 0.94 | 1 | 0.0332 |
| 61 | REB1_H2O2Hi | CCGGGTAA         | MSGGTAA   | 0.93 | 1 | 0.0000 |

|     |               |                     |           |      |   |        |
|-----|---------------|---------------------|-----------|------|---|--------|
| 62  | CBF1_SM       | TCAYGTGAY           | TCAYGTG   | 0.93 | 1 | 0.0000 |
| 63  | SWI4_YPD      | TTTCGNG             | TTTCGYG   | 0.93 | 1 | 0.0000 |
| 64  | CIN5_H2O2Hi   | TTACTAA             | CTTACNT   | 0.93 | 1 | 0.0000 |
| 65  | AFT2_H2O2Hi   | AAAGTGCACCCATT      | GCRCCC    | 0.93 | 1 | 0.0124 |
| 66  | LEU3_YPD      | MRCCGGTACCGGCR      | KACCGG    | 0.93 | 1 | 0.0000 |
| 67  | MET31_SM      | CCACAGTTT           | GCCACAK   | 0.93 | 1 | 0.0565 |
| 68  | ADR1_YPD      | GGRGK               | AAGGNK    | 0.93 | 4 | 0.6707 |
| 69  | RPH1_H2O2Hi   | CCTTAAGGGG          | RGGGG     | 0.92 | 1 | 0.0031 |
| 70  | GLN3_SM       | GATAAGATAAG         | AGATWA    | 0.92 | 3 | 0.0624 |
| 71  | MSN2_H2O2Lo   | MAGGGG              | MRGGGGYG  | 0.92 | 2 | 0.0070 |
| 72  | AFT2_H2O2Lo   | AAAGTGCACCCATT      | GCMCCCR   | 0.92 | 1 | 0.0000 |
| 73  | SWI6_YPD      | TTTCGNG             | KTTTCGYG  | 0.92 | 1 | 0.0000 |
| 74  | GCN4_RAPA     | ARTGACTCW           | TGACTCA   | 0.91 | 1 | 0.0000 |
| 75  | GCN4_SM       | ARTGACTCW           | TGACTCA   | 0.91 | 1 | 0.0000 |
| 76  | GCN4_YPD      | ARTGACTCW           | RTGACTCA  | 0.91 | 1 | 0.0000 |
| 77  | RTG3_H2O2Hi   | GGTCAC              | GTCMC     | 0.91 | 1 | 0.0000 |
| 78  | CIN5_YPD      | TTACTAA             | MTTACNTMA | 0.91 | 1 | 0.0000 |
| 79  | UME6_H2O2Hi   | WGCCGCCGW           | TWRCCGC   | 0.91 | 1 | 0.0000 |
| 80  | YAP1_YPD      | TTASTMA             | TWAGTMAKC | 0.90 | 1 | 0.0000 |
| 81  | SKN7_YPD      | GGWCCRGCCAAAT       | GSCEMG    | 0.90 | 1 | 0.0000 |
| 82  | SWI5_YPD      | YCAGCM              | CCAGCMA   | 0.90 | 1 | 0.0000 |
| 83  | SKN7_H2O2Hi   | GGWCCRGCCAAAT       | GSCSRG    | 0.90 | 1 | 0.0000 |
| 84  | HAP1_YPD      | CCGNTANNNCCG        | KAWNCCGA  | 0.89 | 3 | 0.0000 |
| 85  | MSN4_H2O2Hi   | MAGGGG              | MRGGGG    | 0.89 | 2 | 0.0009 |
| 86  | HAP4_YPD      | YCNNCCAATNANM       | RCCMATSA  | 0.89 | 1 | 0.0000 |
| 87  | NRG1_YPD      | AGGG                | WAGGSWC   | 0.88 | 2 | 0.0161 |
| 88  | SKN7_H2O2Lo   | ATTTGGCYGGSCC       | SGGSC     | 0.88 | 1 | 0.0000 |
| 89  | STP1_YPD      | RCGGCNNNRCGGC       | CRCGGCA   | 0.88 | 1 | 0.0143 |
| 90  | SUT1_YPD      | CGCG                | CRCGG     | 0.87 | 3 | 0.0000 |
| 91  | MCM1_Alpha    | TTACCNNSTTRGGAAS    | TYRGGMAA  | 0.86 | 1 | 0.0000 |
| 92  | RTG3_RAPA     | GTGACC              | GWGACYSR  | 0.86 | 1 | 0.0000 |
| 93  | YAP3_YPD      | TTACTAA             | AWTACTA   | 0.84 | 4 | 0.9342 |
| 94  | STP1_SM       | RCGGCNNNRCGGC       | YACGGCA   | 0.84 | 2 | 0.1886 |
| 95  | YAP5_H2O2Hi   | TTACTAA             | TACTKARM  | 0.84 | 2 | 0.8989 |
| 96  | RIM101_H2O2Hi | CTTGGA              | TTMGCAA   | 0.84 | 2 | 0.9989 |
| 97  | ABF1_YPD      | RTCAYTNNNNACGW      | RTCACK    | 0.83 | 1 | 0.0000 |
| 98  | DAL81_RAPA    | AATCCCGCCCGCGGCTTTT | YRCGGC    | 0.83 | 2 | 0.0000 |
| 99  | AFT2_YPD      | AATGGGTGCACTTT      | GAAAGGG   | 0.82 | 2 | 0.5781 |
| 100 | DAL81_YPD     | AATCCCGCCCGCGGCTTTT | CACGGC    | 0.82 | 1 | 0.0000 |
| 101 | AZF1_YPD      | AAGAAAAA            | YAGARAA   | 0.82 | 2 | 0.0637 |
| 102 | DAL82_SM      | AACGCAATTTTC        | CTTTTC    | 0.82 | 3 | 0.2101 |
| 103 | RPH1_YPD      | CCTTAAGGGG          | TAAGASG   | 0.81 | 3 | 0.6215 |
| 104 | RLM1_YPD      | CTAWWWWTAG          | CTAGW     | 0.81 | 3 | 0.2052 |
| 105 | YAP6_H2O2Hi   | TTACTAA             | CCTAA     | 0.79 | 1 | 0.0000 |
| 106 | YAP6_YPD      | TTACTAA             | CCTAA     | 0.79 | 1 | 0.0000 |
| 107 | GAL4_GAL      | CGGNNNNNNNNNNCCG    | CGGSG     | 0.79 | 2 | 0.9220 |
| 108 | RTG3_SM       | GGTCAC              | AGTCA     | 0.79 | 1 | 0.0685 |
| 109 | TYE7_YPD      | CANNTG              | CACSWGKY  | 0.79 | 1 | 0.0000 |
| 110 | DAL80_RAPA    | GATAA               | GTTAAMAA  | 0.79 | 4 | 0.3117 |
| 111 | GAT1_SM       | GATAA               | GTTAATAA  | 0.79 | 3 | 0.9728 |
| 112 | YOX1_YPD      | YAATA               | WAWTAGGA  | 0.78 | 4 | 0.8999 |
| 113 | NRG1_H2O2Lo   | AGGG                | RGGGAC    | 0.78 | 3 | 0.0012 |

|     |             |                 |          |      |   |        |
|-----|-------------|-----------------|----------|------|---|--------|
| 114 | GCR1_YPD    | GSGGAAGCC       | ASTSGAA  | 0.78 | 4 | 0.0243 |
| 115 | MSN2_Acid   | MAGGGG          | MACGG    | 0.77 | 4 | 0.0000 |
| 116 | MSN4_YPD    | CCCCTK          | CCCAK    | 0.77 | 1 | 0.0112 |
| 117 | PUT3_SM     | CGGNNNNNNNNNCCG | MYCCCGA  | 0.75 | 1 | 0.0011 |
| 118 | YHP1_YPD    | CAATTA          | TWASTGT  | 0.74 | 4 | 0.8391 |
| 119 | DAL80_YPD   | GATAA           | TAGMTRSA | 0.73 | 2 | 0.9500 |
| 120 | GAL4_RAFF   | CGGNNNNNNNNNCCG | GAWCCG   | 0.73 | 3 | 0.5424 |
| 121 | MSN4_Acid   | MAGGGG          | MGGGC    | 0.72 | 3 | 0.0000 |
| 122 | ARR1_YPD    | TTACTAA         | STTAMAA  | 0.72 | 4 | 0.8098 |
| 123 | INO4_YPD    | ATTTACATG       | YTCACAYG | 0.71 | 1 | 0.0000 |
| 124 | SMP1_YPD    | ACTACTAWWWWTAG  | GCTMC    | 0.71 | 2 | 0.4196 |
| 125 | XBP1_H2O2Lo | CTCGAAG         | CCSCG    | 0.70 | 4 | 0.1113 |
| 126 | HAP4_H2O2Lo | KNTNATTGGNNGR   | RAKATTGR | 0.69 | 3 | 0.9999 |
| 127 | MOT3_SM     | YAGGYA          | AGGTT    | 0.69 | 2 | 0.0044 |
| 128 | ROX1_YPD    | YSYATTGTT       | CCTTG    | 0.69 | 2 | 0.0636 |
| 129 | ASH1_BUT14  | YTGACT          | MGGAC    | 0.69 | 4 | 0.0000 |
| 130 | YAP6_H2O2Lo | TTACTAA         | MTTACMT  | 0.68 | 2 | 0.0001 |
| 131 | ROX1_H2O2Lo | AACAATRWR       | SATGSAA  | 0.68 | 4 | 0.0050 |
| 132 | PUT3_YPD    | CGGNNNNNNNNNCCG | CGGGAWG  | 0.68 | 1 | 0.0006 |
| 133 | PHO4_YPD    | CNMACGTG        | YWAAGT   | 0.68 | 2 | 0.5023 |
| 134 | MSN2_RAPA   | CCCCTK          | WATMCCTT | 0.68 | 1 | 0.9966 |
| 135 | GZF3_RAPA   | CTTATC          | RTTAACA  | 0.68 | 4 | 0.3964 |
| 136 | GLN3_YPD    | CTTATCTTATC     | GGTTKAG  | 0.68 | 3 | 0.1965 |
| 137 | MOT3_YPD    | TRCCTR          | TTKATAA  | 0.67 | 3 | 0.8480 |
| 138 | ADR1_HEAT   | MCYCC           | ACYCGA   | 0.66 | 1 | 0.5249 |
| 139 | PDR3_YPD    | TCCGCGGA        | CGRGTAAS | 0.66 | 2 | 0.9938 |
| 140 | UGA3_SM     | CCGNNNCCGG      | WMAYGGTA | 0.66 | 2 | 0.9954 |
| 141 | SIP4_YPD    | YCGGAYRRWGG     | GATAGA   | 0.66 | 1 | 0.9984 |
| 142 | RTG1_SM     | GTGACC          | WWGCCCA  | 0.62 | 3 | 0.7081 |
| 143 | RTG1_RAPA   | GGTCAC          | GTAMACT  | 0.62 | 3 | 0.9899 |
| 144 | DAL82_YPD   | AACGCAATTTTC    | ACAGSAM  | 0.62 | 4 | 0.3856 |
| 145 | PDR1_H2O2Lo | CCGCGG          | AGKCGG   | 0.61 | 1 | 0.9982 |
| 146 | GAL4_YPD    | CGGNNNNNNNNNCCG | TCCGMAS  | 0.61 | 3 | 0.5648 |
| 147 | YAP5_YPD    | TTAGTAA         | SKTAATT  | 0.60 | 4 | 0.0084 |
| 148 | RPH1_SM     | CCTTAAGGGG      | ACTKAG   | 0.60 | 3 | 0.8246 |
| 149 | GZF3_H2O2Hi | CTTATC          | KTACARG  | 0.60 | 1 | 0.6396 |
| 150 | TEC1_Alpha  | RGAATG          | GAGAAAA  | 0.58 | 2 | 0.0137 |
| 151 | UGA3_RAPA   | CCGNNNCCGG      | TATMCTG  | 0.54 | 1 | 0.0058 |
| 152 | MSN4_H2O2Lo | MAGGGG          | YTAAGMG  | 0.54 | 3 | 0.3631 |
| 153 | PDR1_YPD    | CCGCGG          | AWGTGGG  | 0.52 | 2 | 0.0318 |
| 154 | RTG3_YPD    | GTGACC          | ARYAYCAS | 0.50 | 3 | 0.7510 |
| 155 | ROX1_H2O2Hi | AACAATRWR       | CCGAM    | 0.46 | 1 | 0.0000 |
| 156 | MSN4_RAPA   | MAGGGG          | AMCWTAG  | 0.45 | 4 | 0.9965 |

## Novel Predictions

cERMIT predictions on the 196 yeast chip-chip dataset from [31] that do not have known literature consensus.

| # | experiment | prediction | p-value |
|---|------------|------------|---------|
| 1 | CRZ1_YPD   | SGGSC      | 0.0000  |

|    |             |            |        |
|----|-------------|------------|--------|
| 2  | MOT3_H2O2Hi | GGRGG      | 0.0000 |
| 3  | RGM1_YPD    | ATCASNAC   | 0.0000 |
| 4  | ARG80_SM    | MCSGG      | 0.0000 |
| 5  | STB1_YPD    | WTTTGGCG   | 0.0000 |
| 6  | FHL1_YPD    | GYAYRGRTK  | 0.0000 |
| 7  | FHL1_H2O2Hi | CCRKRCM    | 0.0000 |
| 8  | SKN7_HEAT   | CYGGSSC    | 0.0000 |
| 9  | YDR026c_YPD | KTTAMYMGG  | 0.0000 |
| 10 | RAP1_SM     | KGYRYGG    | 0.0000 |
| 11 | FHL1_RAPA   | GYMYRGRKK  | 0.0000 |
| 12 | DAL81_SM    | SGGSC      | 0.0000 |
| 13 | SNT2_YPD    | GNYAGCGCC  | 0.0000 |
| 14 | PHO2_H2O2Hi | ASGGG      | 0.0000 |
| 15 | ASH1_YPD    | SGSCG      | 0.0000 |
| 16 | RFX1_YPD    | TTRCYATG   | 0.0000 |
| 17 | FHL1_SM     | AYCYRNRCA  | 0.0000 |
| 18 | MTH1_GAL    | SGGSC      | 0.0000 |
| 19 | XBP1_YPD    | GCKGNG     | 0.0000 |
| 20 | SFP1_SM     | GTAYKGRY   | 0.0000 |
| 21 | SOK2_BUT14  | SCTGCR     | 0.0000 |
| 22 | MET4_YPD    | CCACRSYT   | 0.0000 |
| 23 | TOS8_YPD    | CMCNGC     | 0.0000 |
| 24 | DOT6_YPD    | SGGSC      | 0.0000 |
| 25 | MTH1_YPD    | SMWGGC     | 0.0000 |
| 26 | DIG1_Alpha  | YGTTCAR    | 0.0000 |
| 27 | GAT3_YPD    | GTRNKGRT   | 0.0000 |
| 28 | OPI1_YPD    | TYCACATG   | 0.0000 |
| 29 | SOK2_YPD    | WTARNSTTT  | 0.0000 |
| 30 | DIG1_BUT90  | MTGAAAC    | 0.0000 |
| 31 | SFP1_YPD    | GSMAGA     | 0.0000 |
| 32 | NDD1_YPD    | RNGTMMACA  | 0.0000 |
| 33 | SPT2_YPD    | KRTMCAAMT  | 0.0000 |
| 34 | RPN4_H2O2Hi | GGTRGMAMAW | 0.0000 |
| 35 | PHD1_YPD    | RGGYAC     | 0.0000 |
| 36 | GAT1_YPD    | GCGRSS     | 0.0000 |
| 37 | DIG1_BUT14  | TGMRACRC   | 0.0000 |
| 38 | MAL33_YPD   | GGTGS      | 0.0000 |
| 39 | PHD1_BUT90  | RSGCAC     | 0.0000 |
| 40 | DIG1_YPD    | TGMAACANR  | 0.0000 |
| 41 | MSN2_HEAT   | TWTCTWGMA  | 0.0000 |
| 42 | MAL13_YPD   | GRKKTSGG   | 0.0000 |
| 43 | RIM101_YPD  | CWTCOA     | 0.0000 |
| 44 | STP4_YPD    | GCCSYAC    | 0.0000 |
| 45 | RLR1_YPD    | TGTANANTA  | 0.0000 |
| 46 | GCR2_SM     | AATAGARS   | 0.0000 |
| 47 | DAT1_YPD    | MYCACCAY   | 0.0000 |
| 48 | MIG1_GAL    | CRGKKG     | 0.0000 |
| 49 | MET4_SM     | SMTGAMTC   | 0.0000 |
| 50 | ARG81_SM    | GAGTCAM    | 0.0000 |
| 51 | RGT1_YPD    | TTTKTMCGR  | 0.0001 |
| 52 | MSN2_YPD    | YYKANTAAC  | 0.0001 |
| 53 | THI2_Thi-   | TTAGRRC    | 0.0007 |

|     |                |            |        |
|-----|----------------|------------|--------|
| 54  | CHA4_SM        | TGNNTGGGW  | 0.0011 |
| 55  | ARO80_YPD      | CKCGGYA    | 0.0014 |
| 56  | HIR2_YPD       | RTGCGAA    | 0.0023 |
| 57  | HMS2_YPD       | TGCARGAW   | 0.0025 |
| 58  | IXR1_YPD       | TGCRTRRG   | 0.0028 |
| 59  | ARO80_SM       | AKTGMCG    | 0.0028 |
| 60  | HSF1_YPD       | KTSTRGAMM  | 0.0029 |
| 61  | ARG81_YPD      | TGASTCMY   | 0.0031 |
| 62  | HOG1_YPD       | MTWWMCAAKR | 0.0033 |
| 63  | PHO2_SM        | GCATGRS    | 0.0035 |
| 64  | ECM22_YPD      | MGGKGS     | 0.0038 |
| 65  | RGT1_GAL       | KTTYTCCG   | 0.0060 |
| 66  | GTS1_YPD       | KAMTAWC    | 0.0077 |
| 67  | GCR2_YPD       | TAAGTWSK   | 0.0101 |
| 68  | CUP9_YPD       | TGACGAR    | 0.0141 |
| 69  | MGA1_H2O2Hi    | MGMNCRG    | 0.0156 |
| 70  | KSS1_YPD       | TWTMTTRKC  | 0.0202 |
| 71  | YFL044C_YPD    | AWTRATACR  | 0.0236 |
| 72  | MET18_YPD      | STAAGTT    | 0.0267 |
| 73  | YAP1_H2O2Hi    | ATCYGAMA   | 0.0269 |
| 74  | HIR1_YPD       | ACCGKAY    | 0.0293 |
| 75  | ARG80_YPD      | GAGTYMMA   | 0.0300 |
| 76  | PHD1_BUT14     | WAGGGYWRC  | 0.0338 |
| 77  | HIR3_YPD       | ATGTMYGG   | 0.0474 |
| 78  | RME1_YPD       | WRCCCTMA   | 0.0557 |
| 79  | RTG3_H2O2Lo    | GTCANGC    | 0.0675 |
| 80  | SFP1_H2O2Lo    | KRWSACATT  | 0.0677 |
| 81  | PHO2_Pi-       | MCCACST    | 0.0689 |
| 82  | YML081W_YPD    | TCRTMAWA   | 0.0809 |
| 83  | YPR196W_YPD    | CAMATGC    | 0.0836 |
| 84  | STB4_YPD       | ATCCGAR    | 0.0964 |
| 85  | YDR520C_YPD    | AACCKC     | 0.1627 |
| 86  | YJL206C_H2O2Lo | MKAYMCAWG  | 0.1697 |
| 87  | KRE33_YPD      | GTTCAAY    | 0.1778 |
| 88  | YJL206C_YPD    | GTKGGGG    | 0.1796 |
| 89  | OAF1_YPD       | CGCRCYY    | 0.1939 |
| 90  | FZF1_YPD       | AGATGCM    | 0.1985 |
| 91  | YBL054W_YPD    | TMAKYGCG   | 0.2238 |
| 92  | KSS1_Alpha     | TATGCAWT   | 0.2296 |
| 93  | YLR278C_YPD    | TCAMTA     | 0.2421 |
| 94  | HMS1_YPD       | TTATSYCA   | 0.2484 |
| 95  | MAL33_H2O2Lo   | TTGRWAY    | 0.2510 |
| 96  | MET28_SM       | AWGGTGG    | 0.2550 |
| 97  | SRD1_YPD       | ATTTRCARM  | 0.2558 |
| 98  | YAP1_HEAT      | RTRTACAMS  | 0.2750 |
| 99  | TBS1_YPD       | TAMKGTAY   | 0.2765 |
| 100 | WAR1_YPD       | TAAAYCWA   | 0.3132 |
| 101 | MSN1_YPD       | ATGRCCA    | 0.3317 |
| 102 | SFP1_H2O2Hi    | MRAAYATC   | 0.3435 |
| 103 | YPR022C_YPD    | TGAWAGT    | 0.3456 |
| 104 | FAP7_YPD       | SAGWGTA    | 0.3557 |
| 105 | MIG1_YPD       | TTAYGTAAK  | 0.3715 |

|     |               |            |        |
|-----|---------------|------------|--------|
| 106 | PIP2_YPD      | WCAAGCNA   | 0.3782 |
| 107 | YER051w_YPD   | YCRMAKT    | 0.3931 |
| 108 | MAL33_H2O2Hi  | GANCAGG    | 0.3953 |
| 109 | BYE1_YPD      | WYGNARRTAT | 0.4066 |
| 110 | RPI1_YPD      | RCGTARA    | 0.4182 |
| 111 | YKR064W_YPD   | AYGTGTMA   | 0.4223 |
| 112 | UME1_YPD      | WTARCKKC   | 0.4323 |
| 113 | YBR239c_YPD   | WCAATT     | 0.4435 |
| 114 | PHO2_YPD      | CMATCM     | 0.4558 |
| 115 | STP2_YPD      | TATAYARTA  | 0.4832 |
| 116 | MOT3_H2O2Lo   | RAAKCKGT   | 0.4849 |
| 117 | RIM101_H2O2Lo | TCRWAG     | 0.5093 |
| 118 | CST6_YPD      | TKACAWAAA  | 0.5286 |
| 119 | UGA3_YPD      | MMTATGTA   | 0.5351 |
| 120 | SFL1_YPD      | TRKGSAAAT  | 0.5497 |
| 121 | YNR063W_YPD   | AWACTATM   | 0.5613 |
| 122 | RLM1_BUT14    | ARRGYSAMAA | 0.5802 |
| 123 | YFL052w_YPD   | RANCATTT   | 0.5868 |
| 124 | STB6_YPD      | ATRCARAA   | 0.5984 |
| 125 | MGA1_YPD      | AYSAAAAG   | 0.6130 |
| 126 | RTG1_YPD      | ATMCYCR    | 0.6282 |
| 127 | GAL80_YPD     | ATGACAG    | 0.6495 |
| 128 | MATA1_YPD     | TRCWTAGW   | 0.6711 |
| 129 | WTM2_YPD      | MTMWMCRTA  | 0.7092 |
| 130 | GAT1_HEAT     | GSYMSSGS   | 0.7200 |
| 131 | HAP4_SM       | GGGWGAT    | 0.7294 |
| 132 | RDR1_YPD      | AWACTATA   | 0.7309 |
| 133 | GAL3_YPD      | ATTKAYAGW  | 0.7386 |
| 134 | MIG3_YPD      | WYMCAAYTT  | 0.7439 |
| 135 | SPT23_YPD     | TGTWMGGA   | 0.7556 |
| 136 | CAD1_H2O2Hi   | KTACTART   | 0.7603 |
| 137 | SIG1_YPD      | TTTRSCCSG  | 0.7759 |
| 138 | WTM1_YPD      | ATGWTAAT   | 0.7777 |
| 139 | ARR1_H2O2Hi   | WTCAWGTA   | 0.7853 |
| 140 | IME1_H2O2Hi   | SGAMRCWT   | 0.8071 |
| 141 | MET28_YPD     | ACATCAYY   | 0.8076 |
| 142 | EDS1_YPD      | AGRTASC    | 0.8140 |
| 143 | RPH1_H2O2Lo   | RTCTGARA   | 0.8232 |
| 144 | HAA1_YPD      | TGTAARTW   | 0.8322 |
| 145 | MSS11_BUT14   | TAATMCAW   | 0.8344 |
| 146 | RDS1_H2O2Hi   | CGRCMGA    | 0.8500 |
| 147 | ADR1_SM       | AAKRYAGYM  | 0.8632 |
| 148 | YER184C_YPD   | SSGGYAAA   | 0.8731 |
| 149 | YAP3_H2O2Hi   | GWGGCGA    | 0.8807 |
| 150 | RDS1_YPD      | AATACRRA   | 0.8838 |
| 151 | PHO2_H2O2Lo   | TGYCCGA    | 0.8840 |
| 152 | YRR1_YPD      | WACGNGTRA  | 0.9223 |
| 153 | IFH1_YPD      | TATGCAWT   | 0.9238 |
| 154 | PDC2_YPD      | ATTRANGA   | 0.9249 |
| 155 | THI2_YPD      | ATCYTKRA   | 0.9328 |
| 156 | MBF1_YPD      | SCACAMAW   | 0.9375 |
| 157 | HAL9_YPD      | AARTCAG    | 0.9410 |



|     |                |           |        |
|-----|----------------|-----------|--------|
| 158 | YDR049W_YPD    | RRCACAAAA | 0.9418 |
| 159 | SMK1_YPD       | STCAMCC   | 0.9457 |
| 160 | NNF2_YPD       | GMYTKARAA | 0.9487 |
| 161 | MDS3_YPD       | KAWYGAA   | 0.9489 |
| 162 | ZMS1_YPD       | KTAATTA   | 0.9617 |
| 163 | RCO1_YPD       | AMRTGATG  | 0.9629 |
| 164 | IME4_YPD       | KTACTTMT  | 0.9687 |
| 165 | YJL206C.H2O2Hi | AAAWGYTC  | 0.9701 |
| 166 | UME1.H2O2Hi    | AACTYAC   | 0.9716 |
| 167 | YGR067C_YPD    | AMACATTW  | 0.9720 |
| 168 | GZF3_YPD       | AATGYSAT  | 0.9726 |
| 169 | YAP7_YPD       | TAYNTACA  | 0.9796 |
| 170 | YDR266c_YPD    | GGKTRATM  | 0.9802 |
| 171 | SUT2_YPD       | GTAACKGY  | 0.9809 |
| 172 | SIP3_YPD       | TYTTSAA   | 0.9826 |
| 173 | USV1_YPD       | TNGCGGCT  | 0.9864 |
| 174 | SIG1.H2O2Hi    | TACSAAT   | 0.9897 |
| 175 | MIG2.H2O2Hi    | AMWACTAT  | 0.9903 |
| 176 | IME4.H2O2Hi    | TGTTRSAA  | 0.9909 |
| 177 | CHA4_YPD       | TTAKGGC   | 0.9921 |
| 178 | RTS2_YPD       | WMRCGATG  | 0.9925 |
| 179 | IME1_YPD       | TCSWCAAM  | 0.9925 |
| 180 | MSS11_YPD      | TMGATWSA  | 0.9930 |
| 181 | UPC2_YPD       | CARKATT   | 0.9936 |
| 182 | ASK10_YPD      | AAGTCRK   | 0.9944 |
| 183 | MIG2_YPD       | AAKTTCAA  | 0.9946 |
| 184 | NDT80_YPD      | RSCCGARW  | 0.9956 |
| 185 | KSS1.BUT90     | MGRTGWRYT | 0.9962 |
| 186 | STB2_YPD       | ACCCMAC   | 0.9967 |
| 187 | YER130C_YPD    | RRCACAAAA | 0.9985 |
| 188 | SNF1_YPD       | AATAWACAA | 0.9986 |
| 189 | ABT1_YPD       | GAWAGTA   | 0.9987 |
| 190 | YBR267W_YPD    | WKGTRARTA | 0.9990 |
| 191 | SPT10_YPD      | ATGTCMG   | 0.9990 |
| 192 | PPR1_YPD       | TTACCCSMM | 0.9996 |
| 193 | HSF1.HEAT      | GTTAGC    | 0.9997 |
| 194 | YKL222C_YPD    | MCRKGTAWA | 0.9997 |
| 195 | ACA1_YPD       | CCARTCA   | 0.9997 |
| 196 | PUT3.H2O2Lo    | TAGAKAC   | 0.9997 |
